# Supplementary material for: LKB1 Expression Correlates with Increased Survival in Patients with Advanced Non–Small Cell Lung Cancer Treated with Chemotherapy and Bevacizumab
Source: Oxford University Press journal article supplement (doi:10.1158/1078-0432.ccr-16-2410), 2017-01-24

**SUPPLEMENTARY FIGURES**

**Supplementary Figure 1**

Kaplan-Meier curves showing progression free survival (PFS, A) and overall survival (OS, B) according to the expression of the LKB1 marker: negative/weak immunohistochemistry expression of LKB1 *versus* moderate/high expression of the marker.

**Supplementary Figure 2**

Kaplan-Meier curves showing overall survival according to treatment (panels A-B) or expression of the LKB1 marker (panels C-D) in patients with non-squamous tumor histology.

**Supplementary Figure 3**

Immunohistochemistry analysis of LKB1 and phosphorylated AMPK (pAMPK) expression in tumor samples. The panels show that loss of LKB1 is associated with reduced pAMPK levels.

**Supplementary Figure 4**

Kaplan-Meier curves for progression-free survival (PFS; A) and overall survival (OS; B) of the overall study population according to treatment with or without bevacizumab.


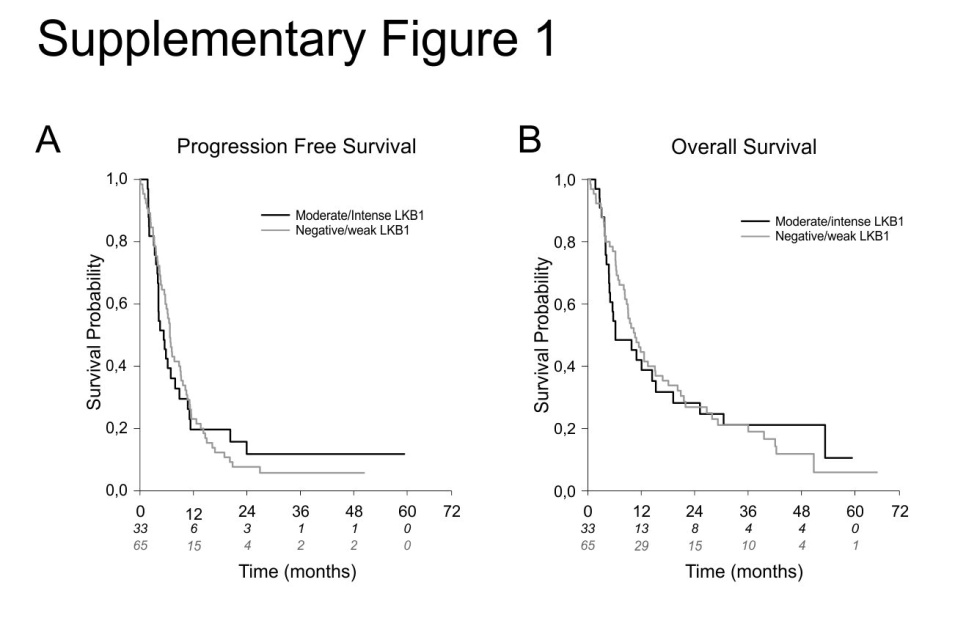


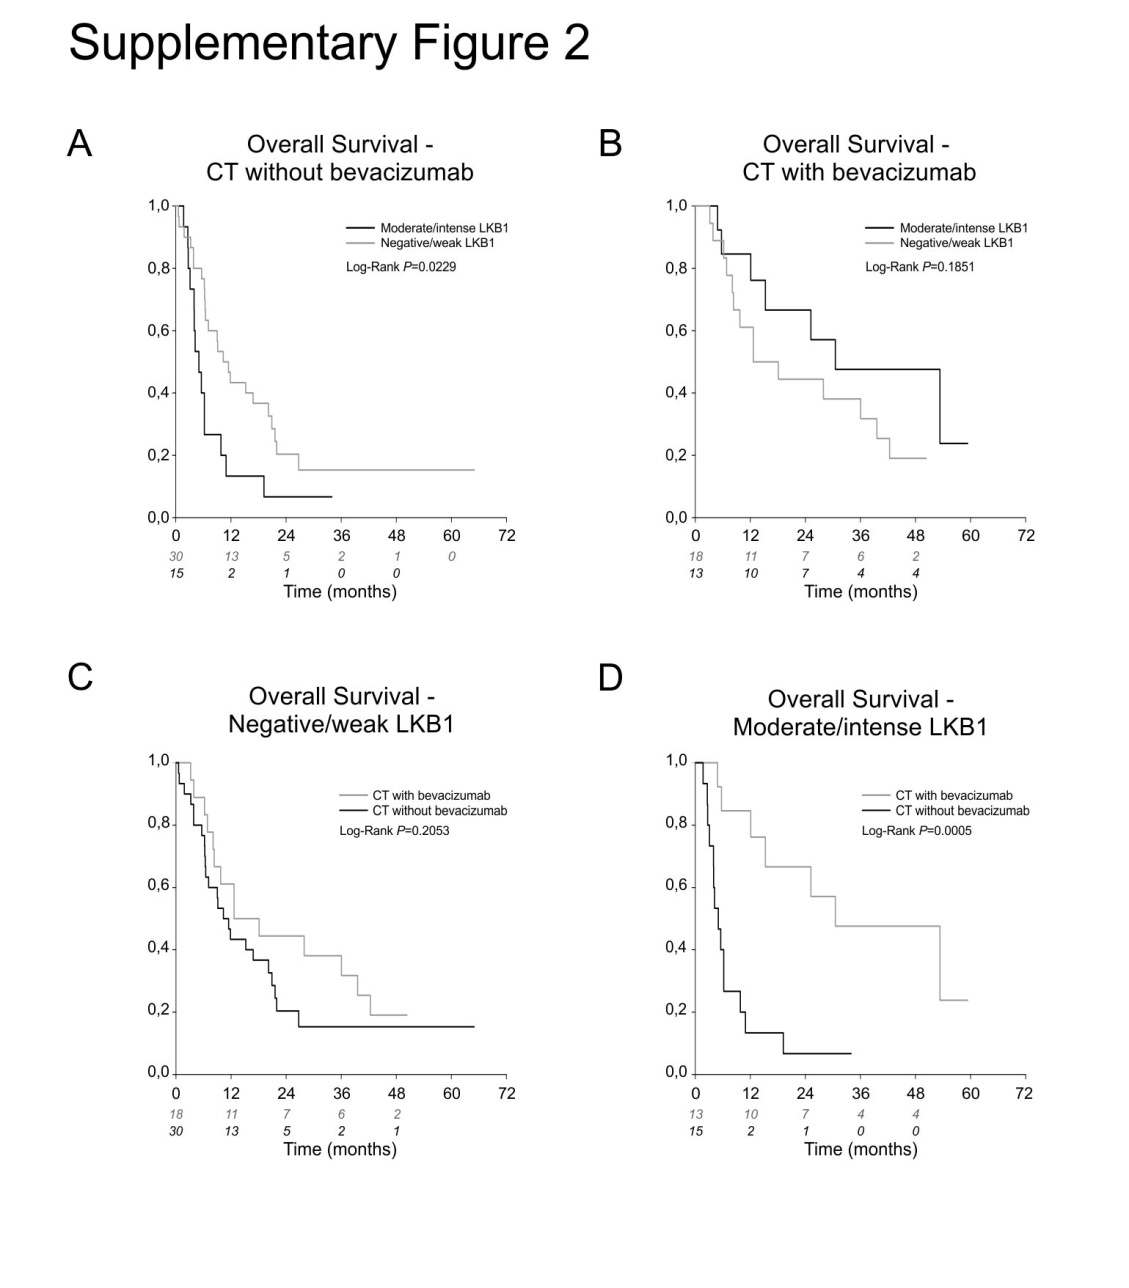


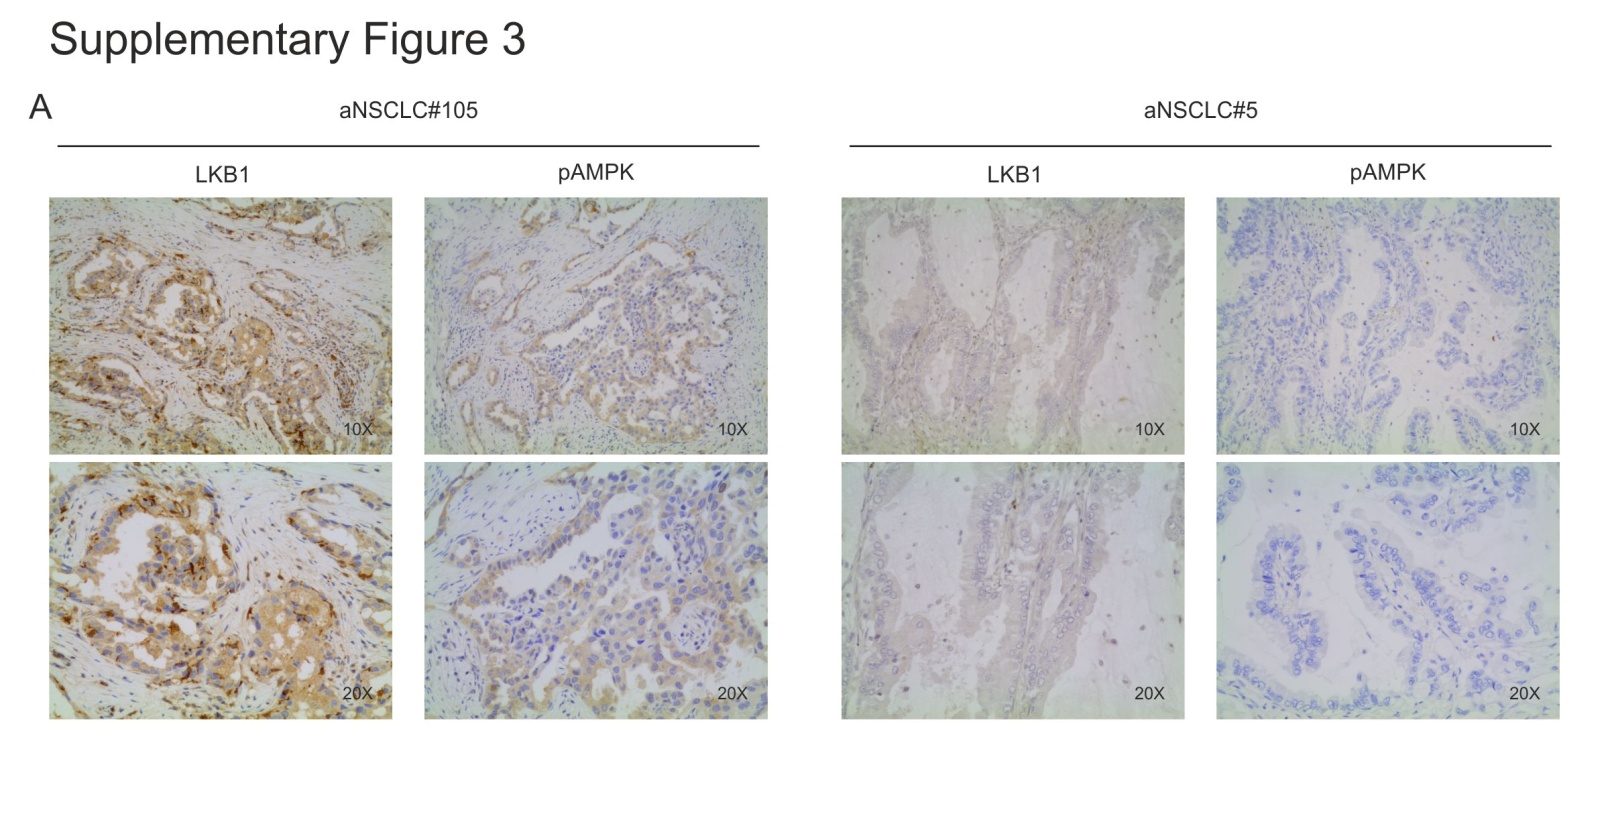


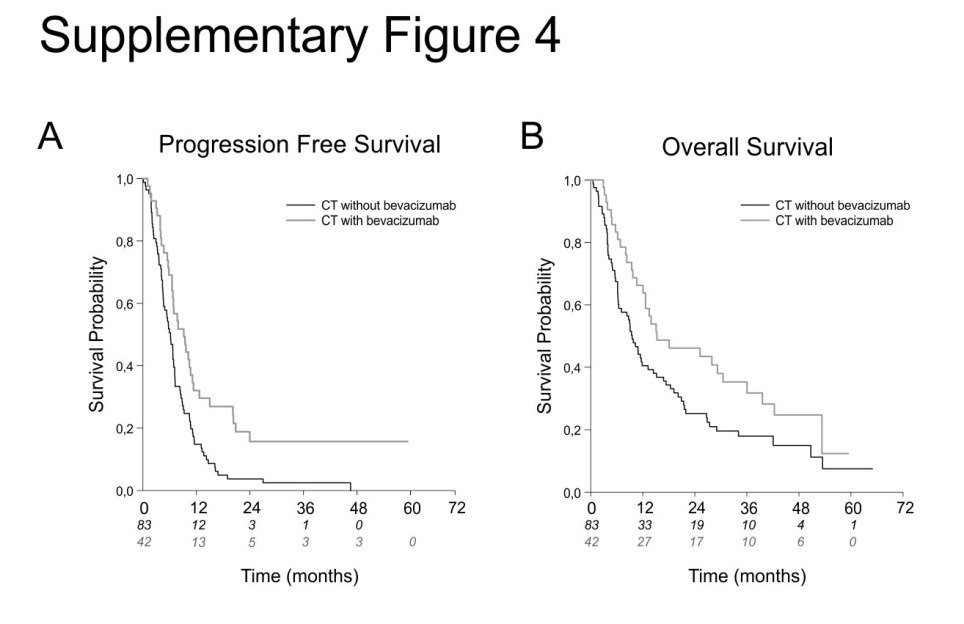

Supplement: 10780432ccr162410-sup-172416_1_supp_3795316_bbkz78.docx [file 10780432ccr162410-sup-172416_1_supp_3795316_bbkz78.docx]
